# Supplementary material for: Performance of a blood-based RNA signature for gemcitabine-based treatment in metastatic pancreatic adenocarcinoma
Source: PubMed Central journal article supplement — J Gastrointest Oncol. 2023 Apr 10;14(2):997–1007. doi: 10.21037/jgo-22-946 (PMC10186541; doi:10.21037/jgo-22-946), 2023-04-10
Supplement: jgo-14-02-997-supplementary.pdf [file jgo-14-02-997-supplementary.pdf]

**Table S1** Clinical data and multiple regression analysis of metastatic LAPC patients treated with gem-based regimen by multivariable analysis

| Baseline characteristics                     | Patients number | GemciTest classification |                  | Univariate      |                  | Multivariate    |                  |
|----------------------------------------------|-----------------|--------------------------|------------------|-----------------|------------------|-----------------|------------------|
|                                              |                 | Negative                 | Positive         | P <sup>OS</sup> | P <sup>PFS</sup> | P <sup>OS</sup> | P <sup>PFS</sup> |
| Number                                       | 43              | 30                       | 13               |                 |                  |                 |                  |
| Comp1                                        | 43              |                          |                  | 6.71E-02        | 0.4062           | –               | –                |
| Comp2                                        | 43              |                          |                  | 0.203           | 0.02             | –               | 0.002            |
| Gender (female)                              | 20 (46%)        | 14 (70%)                 | 6 (30%)          | 0.843           | 0.809            | –               | –                |
| Age (years), median (range)                  | 74 (53.0–85.0)  | 75.0 (58.0–85.0)         | 71.5 (53.0–79.0) | 0.091           | 0.952            | –               | –                |
| Body mass index, mean (SD)                   | 23.0 (3.6)      | 22.8 (3.5)               | 23.5 (3.9)       | 0.95            | 0.734            |                 |                  |
| Geographical region                          |                 |                          |                  | –               | –                | –               | –                |
| France                                       | 37 (86%)        | 27(90%)                  | 10(77%)          |                 |                  |                 |                  |
| US                                           | 5 (12%)         | 3 (10%)                  | 2 (15%)          |                 |                  |                 |                  |
| Czech Rep                                    | 0 (0%)          | 0 (0%)                   | 0 (0%)           |                 |                  |                 |                  |
| Romania                                      | 1 (2%)          | 0 (0%)                   | 1 (8%)           |                 |                  |                 |                  |
| Poland                                       | 0 (0%)          | 0 (0%)                   | 0 (0%)           |                 |                  |                 |                  |
| CA 19–9 (U/mL), mean (SD)                    | 1,865 [7,978]   | 2,459 [9,835]            | 769 [1,874]      | 0.123           | 0.78             | –               | –                |
| Albumin (g/L), mean (SD)                     | 35.1 (7.9)      | 35.2 (9.3)               | 34.8 (4.8)       | 0.00542         | 0.0674           | 0.001           | –                |
| QLQ–C30 Global, mean (SD)                    | 57.3 (15.1)     | 58.8 (17.7)              | 56.4 (14.6)      | –               | –                | –               | –                |
| ECOG PS                                      |                 |                          |                  | 0.001           | 0.116            | 0.002           | –                |
| ECOG [0–1]                                   | 33 (76%)        | 20 (66%)                 | 13 (100%)        |                 |                  |                 |                  |
| ECOG [2+]                                    | 10 (24%)        | 10 (34%)                 | 0 (0%)           |                 |                  |                 |                  |
| Monocyte count (per $\mu$ L), median (range) | 0.55 (0.0–0.93) | 0.60 (0.0–0.93)          | 0.55 (0.2–0.80)  | –               | –                | –               | –                |
| Tumor localization <sup>‡</sup>              |                 |                          |                  |                 |                  |                 |                  |
| Head                                         | 25 (58%)        | 15 (55%)                 | 10 (66%)         | 0.823           | 0.2495           | –               | –                |
| Body                                         | 15 (34%)        | 11 (40%)                 | 4 (26%)          | 0.4             | 0.207            | –               | –                |
| Tail                                         | 2 (8%)          | 1 (5%)                   | 1 (8%)           | 0.106           | 0.001            | –               | 0.002            |

Unless stated otherwise, data are the number of patients (%). <sup>‡</sup>, patients presenting tumors in more than one location are included in both categories. LAPC, locally advanced PDAC; P, P value; Comp1 and Comp2, gene-set component 1 and 2; CA19-9, carbohydrate antigen 19-9; ECOG PS, Eastern Cooperative Oncology Group Performance Status; SD, standard deviation.

**Table S2** Clinical data and multiple regression analysis of metastatic PDAC patients treated with 5FU-based regimen by multivariable analysis

| Baseline characteristics                     | Patients number  | GemciTest classification |                  | Univariate      |                  | Multivariate    |                  |
|----------------------------------------------|------------------|--------------------------|------------------|-----------------|------------------|-----------------|------------------|
|                                              |                  | Negative                 | Positive         | P <sup>OS</sup> | P <sup>PFS</sup> | P <sup>OS</sup> | P <sup>PFS</sup> |
| Number                                       | 59               | 54                       | 5                |                 |                  |                 |                  |
| Comp1                                        |                  |                          |                  | 0.98            | 0.37             | –               | –                |
| Comp2                                        |                  |                          |                  | 0.85            | 0.32             | –               | –                |
| Gender (female)                              | 28 (48%)         | 25 (46%)                 | 3 (60%)          | 0.98            | 0.85             | –               | –                |
| Age (years), median (range)                  | 66.0 (44.0–78.0) | 65.5 (44.0–78.0)         | 68.0 (62.0–71.0) | 0.15            | 0.55             | –               | –                |
| Body mass index, mean (SD)                   | 27.2 (29.2)      | 27.8 (30.6)              | 22.2 (5.0)       | 0.82            | 0.36             | –               | –                |
| Geographical region                          |                  |                          |                  |                 |                  |                 |                  |
| France                                       | 59 (100%)        | 54 (100%)                | 5 (100%)         |                 |                  |                 |                  |
| US                                           | 0 (0%)           | 0 (0%)                   | 0 (0%)           |                 |                  |                 |                  |
| Czech Rep                                    | 0 (0%)           | 0 (0%)                   | 0 (0%)           |                 |                  |                 |                  |
| Romania                                      | 0 (0%)           | 0 (0%)                   | 0 (0%)           |                 |                  |                 |                  |
| Poland                                       | 0 (0%)           | 0 (0%)                   | 0 (0%)           |                 |                  |                 |                  |
| CA 19-9 (U/mL), mean (SD)                    | 38,540 [71,993]  | 41,686 [74,351]          | 2,887 [2,025]    | 0.06            | 0.25             | –               | –                |
| Albumin (g/L), mean (SD)                     | 37.1 (6.5)       | 36.9 (6.8)               | 38.8 (2.5)       | 0.08            | 0.02             | –               | 0.004            |
| ECOG PS                                      |                  |                          |                  | 0.01            | 0.01             | 0.04            | 0.23             |
| ECOG [0–1]                                   | 41 (70%)         | 36 (67%)                 | 5 (100%)         |                 |                  |                 |                  |
| ECOG [2–4]                                   | 15 (30%)         | 15 (33%)                 | 0 (0%)           |                 |                  |                 |                  |
| Monocyte count (per $\mu$ L), median (range) | 0.69 (0.38–1.85) | 0.69 (0.38–1.85)         | 0.77 (0.60–0.93) |                 |                  |                 |                  |
| Tumor localization <sup>†</sup>              |                  |                          |                  |                 |                  |                 |                  |
| Head                                         | 18 (31%)         | 15 (28%)                 | 3 (60%)          | 0.09            | 0.04             | –               | 0.84             |
| Body                                         | 22 (37%)         | 20 (37%)                 | 2 (40%)          | 0.89            | 0.74             | –               | –                |
| Tail                                         | 22 (37%)         | 22 (41%)                 | 0 (0%)           | 0.004           | 0.01             | 0.030           | 0.05             |

Unless stated otherwise, data are the number of patients (%). <sup>†</sup>, patients presenting tumors in more than one location are included in both categories. PDAC, pancreatic ductal adenocarcinoma; P, P value; Comp1 and Comp2, gene-set component 1 and 2; CA19-9, carbohydrate antigen 19-9; ECOG PS, Eastern Cooperative Oncology Group Performance Status; SD, standard deviation.
